# Supplementary material
Source: Royal Society of Chemistry journal article supplement (doi:10.1039/d6ay00164e)
Supplement: d6ay00164e1.pdf [file d6ay00164e1.pdf]

## **Supplementary Information**

### **Development and validation of a cross-species breath metabolomics platform for translational VOC analysis**

Zhiheng Yu<sup>1</sup>, Yongyan Ji<sup>1</sup>, Zijun Meng<sup>1</sup>, Xiang Li<sup>1</sup> \*

<sup>1</sup> Shanghai Key Laboratory of Air Quality and Environmental Health, Department of Environmental Science & Engineering, Fudan University, Shanghai 200438, P.R. China.

\*Corresponding author. Email: [lixiang@fudan.edu.cn](mailto:lixiang@fudan.edu.cn)

**This SI file (Page S1-S11) includes:**

Text S1-S5

Figure S1-S6

Table S1-Table S3

## **Tables of Content**

|                                   |           |
|-----------------------------------|-----------|
| <b>Supplementary Texts.....</b>   | <b>S1</b> |
| <b>Supplementary Tables.....</b>  | <b>S3</b> |
| <b>Supplementary Figures.....</b> | <b>S9</b> |

**Text S1. Inclusion and Exclusion Criteria for Human Participants.**

To minimize potential confounding effects on breath metabolomic profiles, participants meeting any of the following criteria were excluded from the study. Individuals who had undergone abdominal surgery within the preceding three months were excluded. Participants with comorbid systemic diseases were also excluded, including chronic respiratory disorders (such as asthma or chronic obstructive pulmonary disease), hepatic or renal dysfunction (defined as alanine aminotransferase or aspartate aminotransferase levels exceeding twofold the upper limit of normal, or abnormal serum creatinine levels), or a history of malignant disease. Women who were pregnant or breastfeeding at the time of sampling were excluded. In addition, individuals with long-term smoking or alcohol abuse histories, or those who had received antibiotics or probiotic supplements within four weeks prior to breath sample collection, were not eligible for enrollment.

**Text S2. Urine sample preparation and VOC extraction.**

Urine samples were obtained from 26 patients with IBD and 17 healthy volunteers and stored at  $-40\text{ }^{\circ}\text{C}$  until analysis. Prior to measurement, samples were thawed at  $4\text{ }^{\circ}\text{C}$  overnight. For VOC extraction, 2 mL of urine was transferred into a 20 mL glass headspace vial, followed by the addition of 1  $\mu\text{L}$  of internal standard solution (20  $\mu\text{g}/\text{mL}$ ). Volatile compounds were extracted from the headspace using a HiSorb sorptive extraction probe. The probe was positioned in the vial headspace above the liquid phase to prevent direct contact with the urine matrix. Extraction was performed at  $60\text{ }^{\circ}\text{C}$  for 30 min. After extraction, the HiSorb probe was placed into a thermal desorption tube and analyzed by TD–GC–MS/MS.

**Text S3. Animal Husbandry and Habituation Protocol**

All mice were housed under specific pathogen–free (SPF) conditions in individually ventilated cages, maintained at a constant ambient temperature of  $22\text{ }^{\circ}\text{C}$  with a 12-h light/12-h dark cycle. During the three-day pre-modeling period, animals were provided ad libitum access to sterilized drinking water and standard irradiated chow. Following disease induction, both the DSS and EEN groups received DSS solution as the sole source of drinking fluid, and food was withdrawn during the dark phase. During the light phase, mice in the DSS group were provided with standard irradiated chow, whereas mice in the EEN group received exclusive enteral nutrition in place of

regular chow.

To minimize stress associated with physical restraint during breath sampling, a three-day habituation protocol was implemented prior to data collection. On the first day, the restraining device was placed inside the home cage, allowing mice to freely explore and acclimate to its presence and odor. On the second day, mice were gently guided to voluntarily enter the restrainer to familiarize themselves with the confined space. On the third day, a mock sampling procedure was performed, during which mice were placed into the sealed sampling apparatus and supplied with purified air for 15 min, closely mimicking the conditions of actual breath collection.

#### **Text S4. Detailed Instrumental Parameters for TD–GC–MS/MS Analysis**

Thermal desorption–gas chromatography–tandem mass spectrometry (TD–GC–MS/MS) analyses were performed using a Markes TD100-xr thermal desorption system (Markes International Ltd., UK) coupled to a GC–MS/MS platform.

#### **Thermal desorption (TD) conditions.**

The TD system was operated as follows. For primary tube desorption, a dry purge was applied at a flow rate of 100 mL/min for 10 min, followed by thermal desorption at 300 °C with a carrier gas flow of 30 mL/min for 5 min. Volatile compounds were focused on a cold trap (model U-T11GPC-2S) maintained at 30 °C. For secondary desorption, a pre-purge step of 2 min was applied prior to trap desorption at 300 °C for 5 min, with a maximum heating rate exceeding 100 °C/s. Secondary desorption was conducted in splitless mode. The transfer line temperature was set to 180 °C.

#### **Gas chromatography (GC) conditions.**

Chromatographic separation was achieved using a DB-624 capillary column (60 m × 0.25 mm i.d. × 1.4 µm film thickness; Agilent J&W Scientific). High-purity helium (99.999%) was used as the carrier gas at a constant flow rate of 1.0 mL/min. The oven temperature program was as follows: an initial temperature of 40 °C held for 5 min, ramped to 160 °C at 5 °C/min, then increased to 230 °C at 10 °C/min and held for 21 min.

#### **Mass spectrometry (MS) conditions.**

The ion source temperature was set to 230 °C, the quadrupole temperature to 150 °C, and the transfer line temperature to 250 °C. A solvent delay of 2 min was applied. Data acquisition was performed in full-scan mode ( $m/z$  30–350) for qualitative analysis, while selected ion monitoring (SIM) or multiple reaction monitoring (MRM)

modes were used for quantitative analysis.

## **Text S5. Data Preprocessing and Machine Learning Methods**

### **Data Cleaning and Preprocessing Details**

For exhaled VOCs data, missing values were imputed using the half-minimum method, in which missing or undetected values are replaced by half of the minimum non-zero value observed for each feature. For visualization in heatmaps and bubble plots, data were scaled to the range 0–1 using Min-Max normalization. Mouse data were transformed prior to PCA analysis using  $\log_{10}(\text{Concentration}+\epsilon)$ , where  $\epsilon$  is a small constant to avoid errors caused by zero values.

### **Machine Learning Models**

The following algorithms were applied in the analysis: Random Forest (RF), XGBoost, Support Vector Machine (SVM), Lasso Regression, Bridge Regression (a general penalized regression method that includes Lasso and Ridge as special cases), Gradient Boosting Machine (GBM), and K-Nearest Neighbors (KNN).

**Table S1. DAI Scoring Criteria**

| <b>Score</b> | <b>Weight Loss(%)</b> | <b>Stool Consistency</b>         | <b>Rectal Bleeding</b> |
|--------------|-----------------------|----------------------------------|------------------------|
| 0            | None                  | Normal, well-formed stool        | No blood               |
| 1            | 1-5%                  | Slightly soft stool              | Occult blood positive  |
| 2            | 5-10%                 | Clearly soft or mucoid stool     | Mild visible blood     |
| 3            | 10-15%                | Watery stool                     | Moderate bleeding      |
| 4            | >15%                  | Severe diarrhea / unformed stool | Severe bleeding        |

**Table S2.** Linear dynamic ranges, calibration concentration ranges, and correlation coefficients ( $R^2$ ) for the targeted VOCs.

| <b>Compound Name</b> | <b>Calibration Concentration Range (ppm)</b> | <b>Linear Dynamic Range (ppm)</b> | <b>Correlation Coefficient (<math>R^2</math>)</b> |
|----------------------|----------------------------------------------|-----------------------------------|---------------------------------------------------|
| Acetic acid          | 0.5-20                                       | 0.5-20                            | 0.9970                                            |
| Propionic acid       | 0.5-20                                       | 0.5-20                            | 0.9912                                            |
| Dimethyl sulfide     | 0.5-20                                       | 0.5-20                            | 0.9924                                            |
| Isobutyric acid      | 0.5-20                                       | 0.5-20                            | 0.9913                                            |
| Butyric acid         | 0.5-20                                       | 0.5-20                            | 0.9935                                            |
| Valeric acid         | 0.5-20                                       | 0.5-20                            | 0.9968                                            |
| D-limonene           | 0.5-20                                       | 0.5-20                            | 0.9974                                            |
| Benzonitrile         | 0.5-20                                       | 0.5-20                            | 0.9960                                            |
| Phenol               | 0.5-20                                       | 0.5-20                            | 0.9981                                            |
| Geranyl acetone      | 0.5-20                                       | 0.5-20                            | 0.9928                                            |
| Propionaldehyde      | 0.5-20                                       | 0.5-20                            | 0.9853                                            |
| Acetone              | 100-2000                                     | 100-2000                          | 0.9974                                            |
| Isopropanol          | 0.5-20                                       | 0.5-20                            | 0.9967                                            |
| Methacrolein         | 0.5-20                                       | 0.5-20                            | 0.9924                                            |
| Ethyl acetate        | 0.5-20                                       | 0.5-20                            | 0.9726                                            |
| Tert pentanol        | 0.5-20                                       | 0.5-20                            | 0.9957                                            |
| Butanol              | 0.5-20                                       | 0.5-20                            | 0.9873                                            |
| 2-pentanone          | 0.5-20                                       | 0.5-20                            | 0.9932                                            |
| Acetoin              | 0.5-20                                       | 0.5-20                            | 0.9975                                            |
| Hexanal              | 0.5-20                                       | 0.5-20                            | 0.9896                                            |
| 1,2-propanediol      | 0.5-20                                       | 0.5-20                            | 0.9959                                            |
| 2-heptanone          | 0.5-20                                       | 0.5-20                            | 0.9946                                            |
| Heptanal             | 0.5-20                                       | 0.5-20                            | 0.9920                                            |
| Benzaldehyde         | 0.5-20                                       | 0.5-20                            | 0.9785                                            |
| Octanal aldehyde     | 0.5-20                                       | 0.5-20                            | 0.9942                                            |
| Nonanal              | 0.5-20                                       | 0.5-20                            | 0.9871                                            |
| Decanal              | 0.5-20                                       | 0.5-20                            | 0.9952                                            |
| Decane               | 0.5-20                                       | 0.5-20                            | 0.9906                                            |
| Undecane             | 0.5-20                                       | 0.5-20                            | 0.9934                                            |
| Dodecane             | 0.5-20                                       | 0.5-20                            | 0.9927                                            |
| Tridecane            | 0.5-20                                       | 0.5-20                            | 0.9847                                            |
| Tetradecane          | 0.5-20                                       | 0.5-20                            | 0.9968                                            |
| Pentadecane          | 0.5-20                                       | 0.5-20                            | 0.9931                                            |

**Table S3.** List of 71 targeted VOCs and their CAS numbers

| Names                    | CAS       | Names                     | CAS        |
|--------------------------|-----------|---------------------------|------------|
| Isopentane               | 78-78-4   | Decanal                   | 112-31-2   |
| Isoprene                 | 78-79-5   | Cyclohexane               | 110-82-7   |
| Acetone                  | 67-64-1   | 1-(Methylthio)-propane    | 3877-15-4  |
| Cyclopentane             | 287-92-3  | $\alpha$ -Pinene          | 2437-95-8  |
| Hexane                   | 110-54-3  | $\alpha$ -Methylstyrene   | 98-83-9    |
| 2,4-Dimethylpentane      | 108-08-7  | Decane                    | 124-18-5   |
| Ethyl acetate            | 141-78-6  | Undecane                  | 1120-21-4  |
| 2-Methylhexane           | 591-76-4  | Dodecane                  | 112-40-3   |
| 1-Butanol                | 71-36-3   | Tridecane                 | 629-50-5   |
| 2-Pentanone              | 107-87-9  | Tetradecane               | 629-59-4   |
| 3-Methyl-heptane         | 589-81-1  | Pentadecane               | 629-62-9   |
| Acetoin                  | 513-86-0  | Camphene                  | 79-92-5    |
| 1,2-Propanediol          | 57-55-6   | 2-Methylfuran             | 534-22-5   |
| Cyclopentanone           | 120-92-3  | Benzene                   | 71-43-2    |
| Isononane                | 3221-61-2 | 3-(Methylthio)-1-propene  | 10152-76-8 |
| 2-Heptanone              | 110-43-0  | Dimethyl disulfide        | 624-92-0   |
| 6-Methyl-5-heptene-2-one | 110-93-0  | Methyl thiocyanate        | 556-64-9   |
| $\gamma$ -Terpinene      | 99-85-4   | Toluene                   | 108-88-3   |
| 2-Nonanone               | 821-55-6  | 3-Methylthiophene         | 616-44-4   |
| Geranyl acetone          | 3796-70-1 | 3-Furaldehyde             | 498-60-2   |
| Pentane                  | 109-66-0  | Ethylbenzene              | 100-41-4   |
| Propanal                 | 123-38-6  | p-Xylene                  | 106-42-3   |
| Methacrolein             | 78-85-3   | Furfural                  | 98-01-1    |
| Heptane                  | 142-82-5  | o-Xylene                  | 108-38-3   |
| Propanoic acid           | 79-09-4   | Cumene                    | 98-82-8    |
| Octane                   | 111-65-9  | Dimethyl trisulfide       | 3658-80-8  |
| Isobutyric acid          | 79-31-2   | Benzaldehyde              | 100-52-7   |
| Hexanal                  | 66-25-1   | Benzonitrile              | 100-47-0   |
| Butyric acid             | 107-92-6  | 3-Thiophenecarboxaldehyde | 498-62-4   |
| Nonane                   | 111-84-2  | 2-Thiophenecarboxaldehyde | 98-03-3    |
| Heptanal                 | 111-71-7  | Phenol                    | 108-95-2   |
| Valeric acid             | 109-52-4  | Acetophenone              | 98-86-2    |
| Cyclohexanone            | 108-94-1  | m-Cresol                  | 108-39-4   |
| Octanal                  | 124-13-0  | 4-Ethylphenol             | 123-07-9   |
| Hexanoic acid            | 142-62-1  | D-Limonene                | 138-86-3   |
| Nonanal                  | 124-19-6  |                           |            |

**Table S4.** Abbreviations and full names of the 33 core volatile organic compounds (VOCs) selected for mouse breath analysis.

| No. | Compound Name           | No. | Compound Name         |
|-----|-------------------------|-----|-----------------------|
| 1   | Acetic acid(AA)         | 2   | Propionic acid(PA)    |
| 3   | Dimethyl sulfide(DMS)   | 4   | Isobutyric acid(IBA)  |
| 5   | Butyric acid(BA)        | 6   | Valeric acid(VA)      |
| 7   | D-limonene(D-Lim)       | 8   | Benzonitrile(BN)      |
| 9   | Phenol(PhOH)            | 10  | Geranyl acetone(GA)   |
| 11  | Propionaldehyde(PPA)    | 12  | Acetone(Ace)          |
| 13  | Isopropanol(IPA)        | 14  | Methacrolein(MACR)    |
| 15  | Ethyl acetate(EA)       | 16  | Tert pentanol(t-PeOH) |
| 17  | Butanol(BuOH)           | 18  | 2-pentanone(2-PN)     |
| 19  | Acetoin(ACN)            | 20  | Hexanal(HEX)          |
| 21  | 1,2-propanediol(1,2-PD) | 22  | 2-heptanone (2-HP)    |
| 23  | Heptanal(HPT)           | 24  | Benzaldehyde(BZD)     |
| 25  | Octanal aldehyde(OCT)   | 26  | Nonanal(NON)          |
| 27  | Decanal(DEC)            | 28  | Decane(C10)           |
| 29  | Undecane(C11)           | 30  | Dodecane(C12)         |
| 31  | Tridecane(C13)          | 32  | Tetradecane(C14)      |
| 33  | Pentadecane(C15)        |     |                       |

**Table S5.** Histological scoring criteria for colonic damage(0–3 points for each item, with a total score of 0–15)

| Criteria                           | Observation                                                                                                                                                      | Score 0                            | Score 1                                                   | Score 2                                                       | Score 3                                                                                                 |
|------------------------------------|------------------------------------------------------------------------------------------------------------------------------------------------------------------|------------------------------------|-----------------------------------------------------------|---------------------------------------------------------------|---------------------------------------------------------------------------------------------------------|
| Inflammatory cell infiltration     | Target Cells: Lymphocytes (small round nuclei, dark staining), Neutrophils (multi-lobed nuclei, pale pink cytoplasm), Macrophages (large, vacuolated cytoplasm). | None or rare                       | Approx. 5–20 cells                                        | Approx. 20–50 cells                                           | >50 cells or large clusters                                                                             |
| Mucosal / Crypt damage             | Focus: Epithelial integrity and disruption or loss of crypt apices.                                                                                              | Normal                             | Mild epithelial loss or slight disruption of crypt apices | Moderate crypt destruction or focal extensive epithelial loss | Extensive epithelial denudation, ulceration, or extensive crypt destruction                             |
| Crypt architectural distortion     | Focus: Regularity of crypt arrangement and morphology.                                                                                                           | Regular, U-shaped, or columnar     | Mild distortion or discontinuity                          | Significant shortening, bending, or blind-ending formation    | Severe loss of structure, abundant blind sacs, and abnormal dilation                                    |
| Submucosal edema / Hemorrhage      | Focus: Edema (widened connective tissue spaces/vacuoles) and Hemorrhage (scattered red blood cells or deposits, extravascular).                                  | No significant edema or hemorrhage | Mild vacuolization or scattered red spots                 | Moderate vacuolization with few bleeding spots                | Extensive vacuolization/spacing with significant hemorrhagic deposition                                 |
| Muscularis and serosal involvement | Focus: Inflammatory infiltration, edema, or fibrosis-like changes in the muscle layer.                                                                           | No involvement                     | Rare, scattered at the margin of the muscle layer         | Multiple infiltrations or marked vacuolization / edema        | Extensive infiltration / edema, blurred muscle fiber interfaces, or fibrosis (pink collagen deposition) |

**Table S6.** Qualitative and semi-quantitative comparison of the FaunaScope with conventional breath/gas sampling methods.

| <b>Feature/Parameter</b> | <b>FaunaScope</b>               | <b>Tedlar Bags</b>            | <b>Conventional Animal Exposure Chambers</b> |
|--------------------------|---------------------------------|-------------------------------|----------------------------------------------|
| Primary Material         | Poly(methyl methacrylate) ,PMMA | Polyvinyl fluoride (PVF) film | Polycarbonate / Acrylic                      |
| Background Emissions     | Minimal                         | High                          | Moderate to High                             |
| Dead Volume              | Minimized (~ 600 mL)            | Variable (usually 1–5 L)      | Massive (Typically > 3 L)                    |
| Sample Dilution / SNR    | Low dilution / High SNR         | Moderate                      | Severe dilution / Low SNR                    |
| References               | N/A                             | [1], [2]                      | [3]                                          |

Supplementary References:

[1] K. Westphal, D. Dudzik, M. Waszczuk-Jankowska, B. Graff, K. Narkiewicz and M. Markuszewski, *Metabolites*, 2023, 13.

[2] J. Kwak, M. Fan, J. A. Martin, D. K. Ott and C. C. Grigsby, *Anal Sci*, 2017, 33, 147 – 152.

[3] K. Hintzen, A. Smolinska, A. Mommers, N. Bouvy, F. van Schooten and T. Lubbers, *Journal of Breath Research*, 2022, 16.

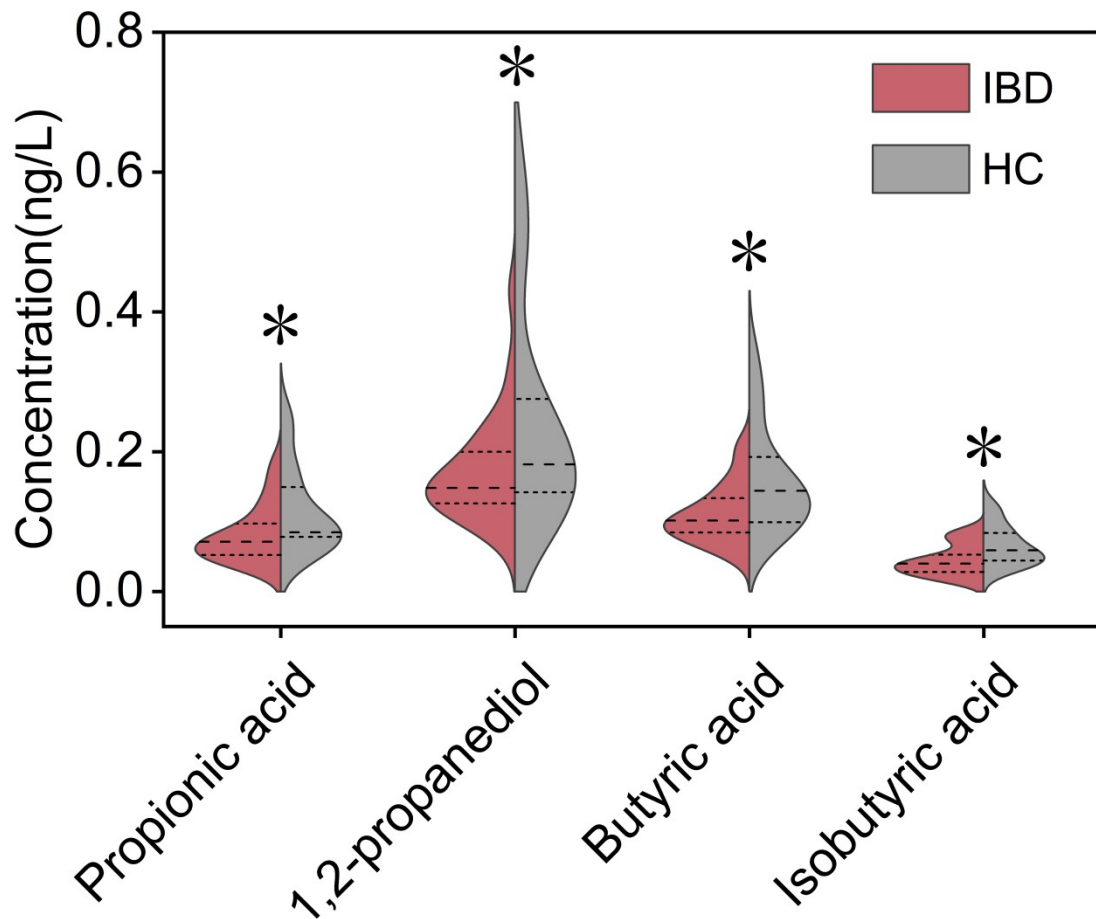

**Fig. S1. Comparison of short-chain fatty acid (SCFA) concentrations in urine between IBD patients and healthy controls (HC).** The violin plot shows the urinary concentration distribution of four key metabolic biomarkers: propionic acid, 1,2-propanediol, butyric acid, and isobutyric acid between the two groups. The results indicate that, compared to the healthy control group, the concentrations of these four SCFAs and their derivatives are significantly lower in the urine of IBD patients. This trend is highly consistent with the results from breath samples, further confirming the reliability of these biomarkers. (\* indicates  $p < 0.05$ , ).

**Figure S2. Macroscopic and histological characteristics of the colon in DSS- and EEN-treated mice.** A, Colon length measurement shows significant shortening in DSS mice, while EEN-treated mice maintain near-normal colon length. B, Histological scores indicate that EEN intervention markedly reduces microscopic colonic damage. Data are presented as mean  $\pm$  SD.

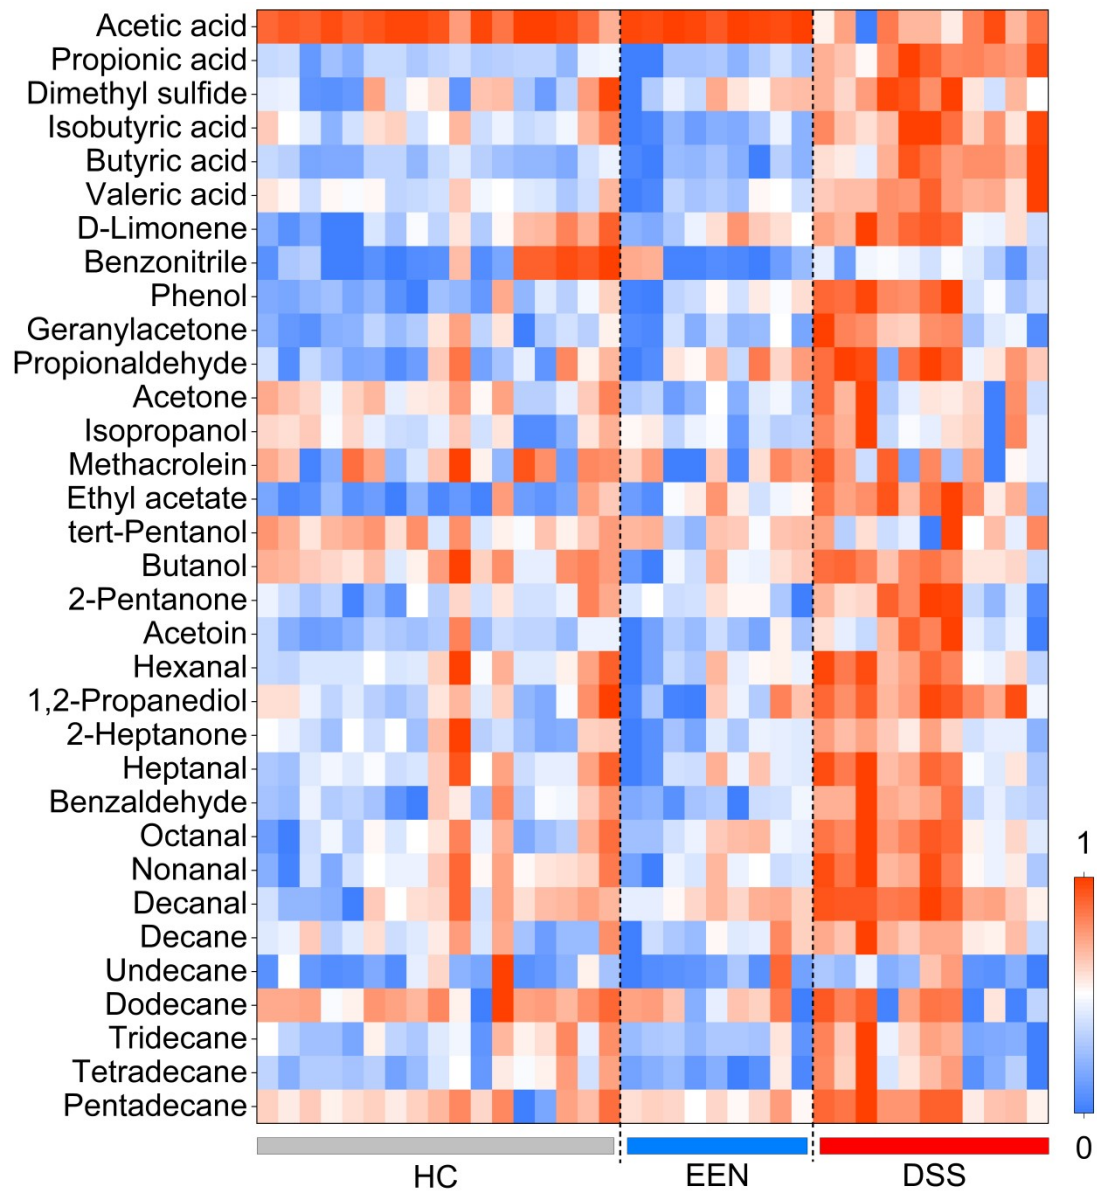

**Figure S3. Heatmap of the full spectrum of breath metabolites in HC, DSS, and EEN mice.** This heatmap displays the relative abundance of all detected volatile organic compounds in the breath of mice from HC group, DSS group, and EEN group. The figure clearly reveals that DSS-induced colitis caused extensive and significant disturbances in the overall breath metabolic profile of the mice.
